# Supplementary material
Source: Springer Nature journal article supplement (https://www.springermedizin.de/resource/supplementary/12891_2011_1335_MOESM1_ESM.pdf/9508060)

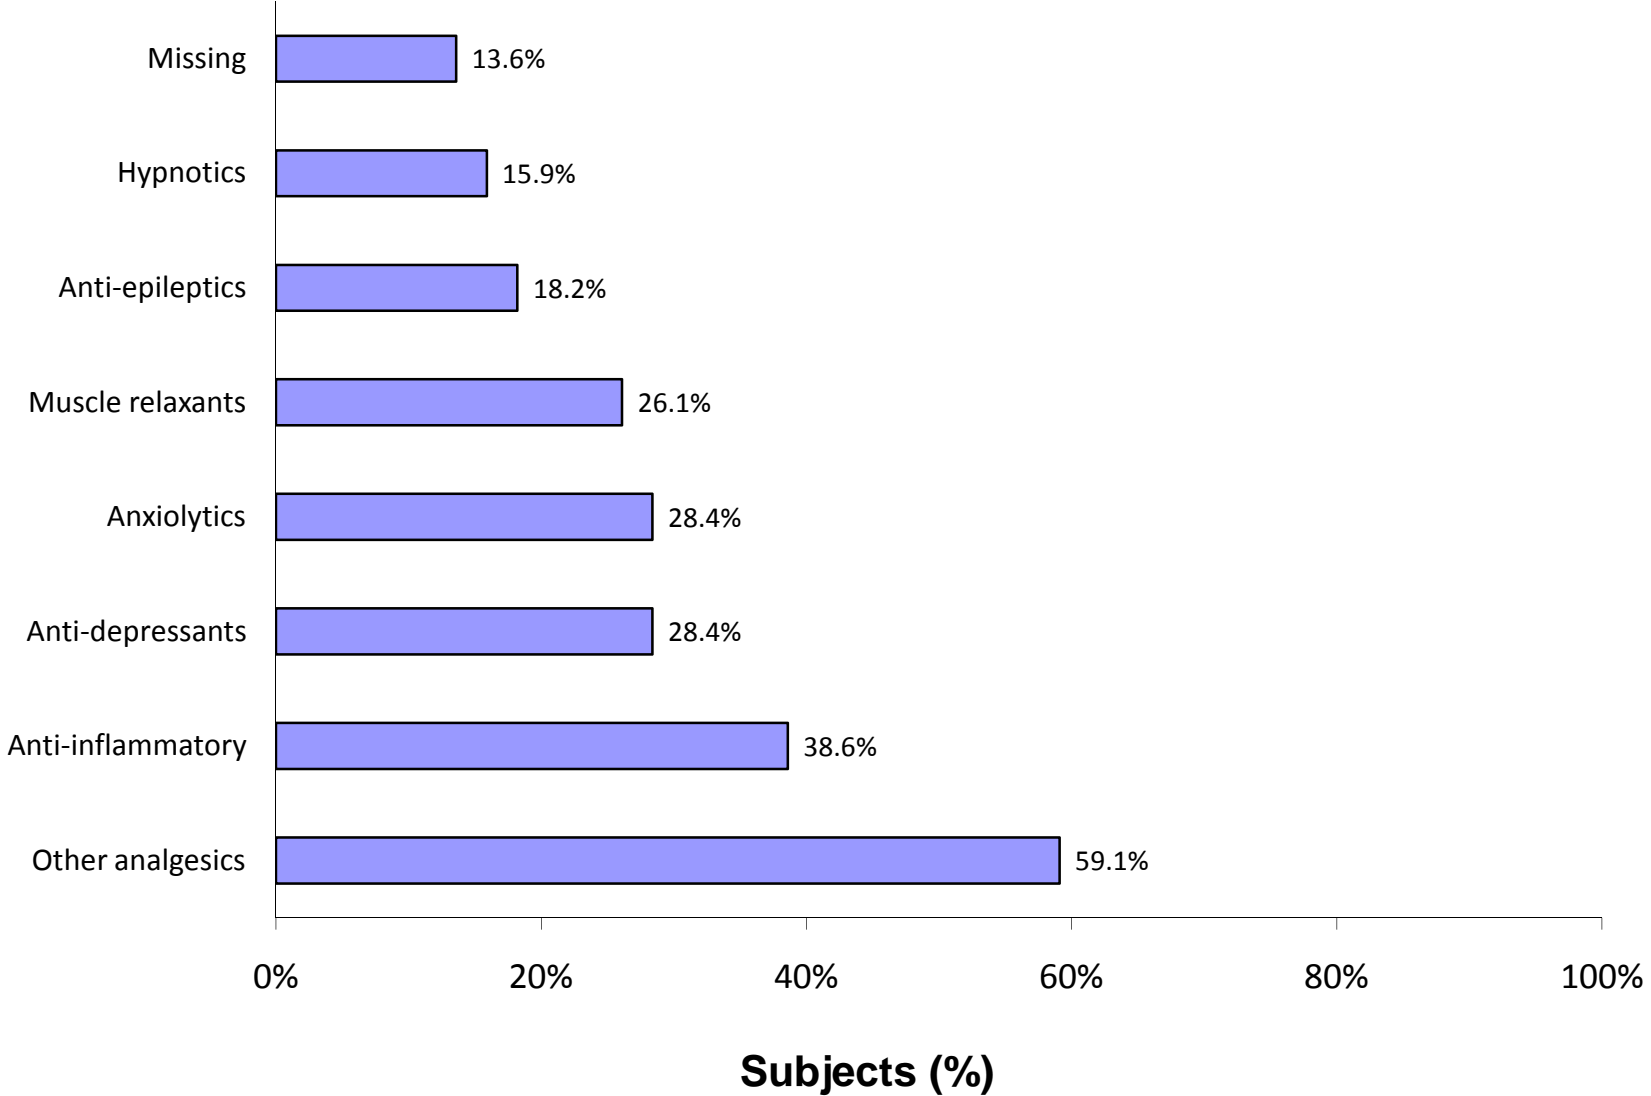

Supplement: MOESM1 [file 9508060]
